# Supplementary material for: Efficacy and Safety of Long-Term Treatment with Stiripentol in Children and Adults with Drug-Resistant Epilepsies: A Retrospective Cohort Study of 196 Patients
Source: PubMed Central journal article supplement — Drugs Real World Outcomes. 2022 Jun 9;9(3):451–61. doi: 10.1007/s40801-022-00305-7 (PMC9392664; doi:10.1007/s40801-022-00305-7), 2022-06-09
Supplement: 40801_2022_305_MOESM1_ESM.pdf [file 40801_2022_305_MOESM1_ESM.pdf]

## Drugs - Real World Outcomes

### **Efficacy and safety of long-term treatment with stiripentol in children and adults with drug-resistant epilepsies: a retrospective cohort study of 196 patients**

#### ***Stiripentol in drug-resistant epilepsies***

Simona Balestrini<sup>1,2</sup>, Viola Doccini<sup>1</sup>, Alessandra Boncristiano<sup>1</sup>, Matteo Lenge<sup>1</sup>, Salvatore De Masi<sup>3</sup>, Renzo Guerrini<sup>1</sup>

<sup>1</sup>. Neuroscience Department, Meyer Children's Hospital-University of Florence, Florence, Italy;

<sup>2</sup>. Department of Clinical and Experimental Epilepsy, UCL Queen Square Institute of Neurology, London, and Chalfont Centre for Epilepsy, Buckinghamshire, UK;

<sup>3</sup>. Clinical Trial Office, Meyer Children's University Hospital, Florence, Italy.

**Supplementary Table 1. Data collection template.**

|                                                   |
|---------------------------------------------------|
| ID                                                |
| recordid                                          |
| gender                                            |
| date of birth                                     |
| date at seizure onset                             |
| epilepsy type                                     |
| aetiology                                         |
| epilepsy syndrome                                 |
| focal onset Y/N                                   |
| focal motor Y/N                                   |
| focal non-motor Y/N                               |
| focal to bilateral tonic clonic Y/N               |
| generalised tonic clonic Y/N                      |
| generalised spasms Y/N                            |
| generalised onset absence Y/N                     |
| generalised onset myoclonic                       |
| generalised onset atonic                          |
| spasm frequency before STP                        |
| generalised tonic clonic szs frequency before STP |
| absence frequency before STP                      |
| myoclonic szs frequency before STP                |
| atonic szs frequency before STP                   |
| focal szs frequency before STP                    |
| focal to bilateral szs frequency before STP       |
| generalised szs frequency before STP              |
| Date at STP introduction                          |
| Max dose                                          |
| Date when max dose was reached                    |
| Treatment with ACTH before STP (Y/N)              |
| Treatment with CBZ before STP (Y/N)               |
| Treatment with CLB before STP (Y/N)               |

|                                                |
|------------------------------------------------|
| Treatment with CLZ before STP (Y/N)            |
| Treatment with ETX before STP (Y/N)            |
| Treatment with FBM before STP (Y/N)            |
| Treatment with hydrocortisone before STP (Y/N) |
| Treatment with LCS before STP (Y/N)            |
| Treatment with LEV before STP (Y/N)            |
| Treatment with LCS before STP (Y/N)            |
| Treatment with LZP before STP (Y/N)            |
| Treatment with NZP before STP (Y/N)            |
| Treatment with OXC before STP (Y/N)            |
| Treatment with PB before STP (Y/N)             |
| Treatment with PER before STP (Y/N)            |
| Treatment with PREG before STP (Y/N)           |
| Treatment with PHT before STP (Y/N)            |
| Treatment with RUF before STP (Y/N)            |
| Treatment with TPM before STP (Y/N)            |
| Treatment with VGB before STP (Y/N)            |
| Treatment with VPA before STP (Y/N)            |
| Treatment with ZNS before STP (Y/N)            |
| Add-on drug to STP 1                           |
| Dose add-on drug to STP 1                      |
| Add-on drug to STP 2                           |
| Dose add-on drug to STP 2                      |
| Add-on drug to STP 3                           |
| Dose add-on drug to STP 3                      |
| Add-on drug to STP 4                           |
| Dose add-on drug to STP 4                      |
| spasm frequency on STP                         |
| generalised tonic clonic szs frequency on STP  |
| absence frequency on STP                       |
| myoclonic szs frequency on STP                 |
| atonic szs frequency on STP                    |

|                                                 |
|-------------------------------------------------|
| focal szs frequency on STP                      |
| focal to bilateral szs frequency on STP         |
| generalised szs frequency on STP                |
| Efficacy                                        |
| outcome                                         |
| Date at first FU after STP introduction         |
| Relapse Y/N                                     |
| Date at relapse                                 |
| STP withdrawal                                  |
| Date at STP withdrawal                          |
| Reason for withdrawal                           |
| Other info                                      |
| Add-on treatment after STP introduction         |
| Date at add-on treatment after STP introduction |
| Adverse events on STP Y/N                       |
| Type of adverse events: dermatological          |
| Type of adverse events: haematological          |
| Type of adverse events: neurological            |
| Type of adverse events: hepatic                 |
| Type of adverse events: genitourinary           |
| Type of adverse events: gastroenterological     |
| Other adverse events                            |
| Date at last follow-up                          |
| Reduction concurrent treatment                  |
| Number of add-on treatments at last FU          |
| Responder Y/N                                   |
| Seizure freedom Y/N                             |

**Supplementary Table 2. List of patients exposed to stiripentol with genetic aetiologies other than Dravet syndrome.**

| <b>Genetic abnormality</b>                                            | <b>Age (years)</b> | <b>Responders (Y/N)</b> | <b>Relapse (Y/N, time in months after STP initiation)</b> | <b>Type of epilepsy</b> | <b>Type of seizures</b>                        | <b>Concomitant antiseizure medications</b> | <b>Comorbidities</b>                                            | <b>Observation period (months)</b> |
|-----------------------------------------------------------------------|--------------------|-------------------------|-----------------------------------------------------------|-------------------------|------------------------------------------------|--------------------------------------------|-----------------------------------------------------------------|------------------------------------|
| <i>SHANK3</i><br>c.4020_4021 del (frameshift); <i>de novo</i>         | 7                  | Y                       | Y, 4                                                      | generalised             | Tonic-clonic (during sleep), atonic, myoclonic | VPA, ETM, CLB                              | Autism spectrum disorder                                        | 24                                 |
| <i>KMT2A</i><br>c.3460C>T (missense) <i>de novo</i>                   | 12                 | Y                       | Y, 8                                                      | generalised             | Atypical absences, myoclonic                   | VPA, CLB                                   | Moderate intellectual disability                                | 11                                 |
| <i>HCN1</i><br>c.459G>C (missense); <i>de novo</i>                    | 3                  | Y                       | Y, 7                                                      | focal                   | Tonic (during sleep), focal-onset              | VPA, CLB                                   | Autism spectrum disorder                                        | 50                                 |
| <i>STARD7</i><br>chr2:g.96862805AAAAT[(n)]/AAATG[(n)]; <i>de novo</i> | 34                 | Y                       | N                                                         | generalised             | Tonic-clonic                                   | LMT, CLB                                   | Intellectual disability, cortical tremor                        | 103                                |
| <i>PPP2R3A</i><br>c. 2945G>T (VOUS); <i>de novo</i>                   | 8                  | Y                       | Y, 25                                                     | generalised             | Tonic (mainly during sleep)                    | PHT, CLB                                   | Major malformations (dextrocardia, diaphragmatic hernia, radio- | 46                                 |

|                                                                        |    |   |       |             |                                                        |          |                                                                                   |     |
|------------------------------------------------------------------------|----|---|-------|-------------|--------------------------------------------------------|----------|-----------------------------------------------------------------------------------|-----|
|                                                                        |    |   |       |             |                                                        |          | ulnar<br>synostosis)                                                              |     |
| <i>KCNT1</i><br>c.1066C>T (missense); <i>de novo</i>                   | 1  | N | -     | focal       | Focal-onset with<br>focal to bilateral<br>tonic-clonic | CLB, PB  | Spastic<br>tetraparesis,<br>severe<br>intellectual<br>disability,<br>microcephaly | 104 |
| <i>FAT4</i><br>c.1687G>T (missense) mat;<br>c.8224A>G (missense) pat   | 4  | Y | Y, 12 | combined    | Tonic                                                  | VPA, CLB | Severe<br>intellectual<br>disability,<br>macrocephaly,<br>dysmorphic<br>features  | 35  |
| <i>CACNA1A</i><br>c.6706-6716del mat; c.1917-<br>3C>G (frameshift) pat | 5  | Y | Y, 2  | generalised | Atypical absences                                      | VPA, CLB | Mild intellectual<br>disability                                                   | 3   |
| <i>SYNGAP1</i><br>c.3061C>T (nonsense); <i>de novo</i>                 | 3  | Y | Y, 5  | generalised | Atypical absences                                      | VPA, CLB | Autism<br>spectrum<br>disorder                                                    | 6   |
| <i>KCNT1</i><br>c.2782 C>T (missense); mat                             | 14 | Y | Y, 6  | focal       | Focal-onset<br>(during sleep)                          | CLB      | Mild intellectual<br>disability                                                   | 20  |
| <i>CDKL5</i><br>c.473G>C (missense); <i>de novo</i>                    | 1  | N | -     | combined    | Tonic, myoclonic,<br>epileptic spasms                  | VPA, CLB | Dystonic-<br>dyskinetic<br>tetraparesis,                                          | 43  |

|                                                                          |     |   |      |             |                                      |          |                                                                                                                      |    |
|--------------------------------------------------------------------------|-----|---|------|-------------|--------------------------------------|----------|----------------------------------------------------------------------------------------------------------------------|----|
|                                                                          |     |   |      |             |                                      |          | severe intellectual disability, microcephaly                                                                         |    |
| <i>SCL35A3</i><br>c.73C>T (missense);<br>c.899_900delTTinsA (frameshift) | 4   | N | -    | generalised | Tonic, epileptic spasms              | VPA, CLZ | Dystonic-dyskinetics tetraparesis, severe intellectual disability, microcephaly, dysmorphic features, arthrogryposis | 72 |
| Ring 14                                                                  | 7   | Y | Y,11 | combined    | Focal-onset, tonic                   | VPA, CLZ | Moderate intellectual disability, renal agenesis                                                                     | 26 |
| <i>CDKL5</i><br>c.119C>T (missense); <i>de novo</i>                      | 0.4 | Y | Y, 4 | combined    | Focal-onset, tonic, epileptic spasms | CLB      | Dystonic-dyskinetic tetraparesis, severe intellectual disability, microcephaly                                       | 8  |

|                                                                        |   |   |       |          |                                                       |               |                                                                    |    |
|------------------------------------------------------------------------|---|---|-------|----------|-------------------------------------------------------|---------------|--------------------------------------------------------------------|----|
| <i>CACNA1A</i><br>c.4067 C>T (missense); <i>de novo</i>                | 7 | N | -     | focal    | Focal-onset, with focal to bilateral tonic-clonic     | VPA, CLB      | Tetraparesis, severe intellectual disability, macrocephaly         | 17 |
| Del 5q12.3                                                             | 3 | Y | N     | combined | Atypical absences, tonic-clonic, focal-onset          | VPA, CLB      | Moderate intellectual disability, behaviour disorder, sleep apnoea | 43 |
| Ring 20                                                                | 9 | N | -     | combined | Tonic (during sleep), focal to bilateral tonic-clonic | VPA, CLZ, ZNS | Moderate intellectual disability, behaviour disorders              | 59 |
| <i>PIEZO1</i><br>c.3000C>A (missense) pat;<br>c.5727A>C (missense) mat | 4 | Y | Y, 23 | focal    | Focal-onset with focal to bilateral tonic-clonic      | VPA, CLB      | Moderate intellectual disability                                   | 40 |
| <i>HCN1</i><br>c.2829A>G (missense); <i>de novo</i>                    | 1 | Y | Y, 10 | combined | Tonic, epileptic spasms, focal-onset, tonic-clonic    | VPA; CLB; PB  | Spastic tetraparesis, severe intellectual disability, microcephaly | 23 |



|                                                          |    |   |      |             |                                                         |               |                                                                                           |    |
|----------------------------------------------------------|----|---|------|-------------|---------------------------------------------------------|---------------|-------------------------------------------------------------------------------------------|----|
| <i>CDKL5</i><br>Del exon 1; <i>de novo</i>               | 3  | N | -    | combined    | Tonic, epileptic spasms, focal-onset, tonic-clonic      | VPA, CLB      | Dystonic-dyskinetic tetraparesis, severe intellectual disability, microcephaly            | 14 |
| Dup Xq28                                                 | 2  | N | -    | generalised | Atonic                                                  | VPA, CLB      | Intellectual disability                                                                   | 17 |
| <i>FOXG1</i><br>c.555G>A (missense); <i>de novo</i>      | 10 | Y | N    | combined    | Myoclonic absences                                      | VPA, ETM, CLB | Moderate intellectual disability, microcephaly                                            | 3  |
| <i>SCN8A</i><br>c.5614C>T (missense), <i>de novo</i>     | 1  | N | -    | generalised | Tonic                                                   | VPA, CLB      | Tetraparesis, severe intellectual disability, tremor and cortical myoclonus, microcephaly | 42 |
| <i>PCDH19</i><br>c.2697dupA (frameshift), <i>de novo</i> | 2  | Y | Y, 1 | combined    | Focal-onset with focal to bilateral tonic-clonic, tonic | CLB           | Autism spectrum disorder                                                                  | 30 |

|                                                                                                                                                                                                |     |   |     |             |                                                  |          |                                                                                                                                      |    |
|------------------------------------------------------------------------------------------------------------------------------------------------------------------------------------------------|-----|---|-----|-------------|--------------------------------------------------|----------|--------------------------------------------------------------------------------------------------------------------------------------|----|
| <p><i>GGA2</i><br/>c.208 A&gt;G (missense), <i>de novo</i></p> <p><i>TENM1</i><br/>c.2972C&gt;T (missense), mat</p> <p><i>NDST2</i><br/>c.1328 A&gt;G (missense) <i>de novo</i><br/>(VOUS)</p> | 0.8 | Y | N   | generalised | Tonic-clonic<br>(mainly during<br>fever)         | CLB      | Hyperactivity                                                                                                                        | 17 |
| Del19p13.2                                                                                                                                                                                     | 10  | Y | Y,5 | generalised | Myoclonic,<br>atypical absences,<br>tonic-clonic | VPA, CLB | Moderate<br>intellectual<br>disability,<br>severe<br>behaviour<br>disorder,<br>microcephaly                                          | 14 |
| Del16p13.3-13.2                                                                                                                                                                                | 11  | Y | N   | focal       | Focal-onset motor                                | VPA, CLB | Moderate<br>intellectual<br>disability,<br>severe oromotor<br>dyspraxia,<br>macrocephaly<br>and hypotonia,<br>dysmorphic<br>features | 5  |
| <i>NPRL3</i>                                                                                                                                                                                   | 8   | N | -   | focal       | Focal-onset                                      | CBZ, CLB | None                                                                                                                                 | 26 |

|                                                                          |   |   |   |             |                         |               |                                                                                                            |    |
|--------------------------------------------------------------------------|---|---|---|-------------|-------------------------|---------------|------------------------------------------------------------------------------------------------------------|----|
| c.980C>T (missense) mat                                                  |   |   |   |             |                         |               |                                                                                                            |    |
| <i>SLC35A3</i><br>c.73C>T (missense);<br>c.899_900delTTinsA (frameshift) | 2 | Y | N | generalised | Tonic, epileptic spasms | VPA           | Apostural tetraparesis, severe intellectual disability, microcephaly, dysmorphic features, arthrogyriposis | 72 |
| <i>SYNGAP1</i><br>c.3112del <i>de novo</i>                               | 4 | Y | N | generalised | Myoclonic absences      | VPA, CLB      | Severe intellectual disability                                                                             | 10 |
| Ring 20                                                                  | 5 | Y | N | focal       | Focal-onset             | VPA, CLB, CBZ | ADHD                                                                                                       | 17 |
| <i>SMCIA</i><br>c.3103 C>T (non-sense); <i>de novo</i>                   | 1 | Y | N | combined    | Focal-onset, tonic      | CLB           | Intellectual disability                                                                                    | 2  |

Abbreviations: ADHD=attention deficit hyperactivity disorder, CBZ=carbamazepine, CLB=clobazam, CLZ=clonazepam, ETM=ethosuximide, LMT=lamotrigine, PB=phenobarbital, VPA=valproic acid, ZNS=zonisamide
